# Supplementary material for: Can nitro groups really anchor onto TiO2? Case study of dye-to-TiO2adsorption using azo dyes with NO2substituents
Source: Royal Society of Chemistry journal article supplement (doi:10.1039/c6cp02294d), 2016-01-01
Supplement: c6cp02294d1.pdf [file c6cp02294d1.pdf]

# Can nitro groups really anchor onto TiO<sub>2</sub>? Case study of dye-to-TiO<sub>2</sub> adsorption using azo dyes with NO<sub>2</sub> substituents

*Lei Zhang,<sup>ab</sup> and Jacqueline M. Cole,<sup>\*bcde</sup>*

<sup>a</sup> Department of Physics, Nanjing University of Information Science & Technology, Nanjing 210044, China.

<sup>b</sup> Cavendish Laboratory, University of Cambridge, J. J. Thomson Avenue, Cambridge, CB3 0HE, UK. E-mail:  
jmc61@cam.ac.uk

<sup>c</sup> Argonne National Laboratory, 9700 S Cass Avenue, Argonne, IL 60439, USA

<sup>d</sup> ISIS Neutron and Muon Facility, STFC Rutherford Appleton Laboratory, Harwell Science and Innovation  
Campus, Didcot, OX11 0QX, UK.

<sup>e</sup> Department of Chemical Engineering and Biotechnology, University of Cambridge, Charles Babbage Road,  
Cambridge, CB3 0FS, UK.

Nitro, Azo, Dye-sensitized solar cell, DFT, TDDFT, Optoelectronic material

## Electronic Supplementary Information

### Table of Contents

|                                                                                                                                                                                                                                                                                                                                                                                       |    |
|---------------------------------------------------------------------------------------------------------------------------------------------------------------------------------------------------------------------------------------------------------------------------------------------------------------------------------------------------------------------------------------|----|
| <b>Table S1</b> Absorption intensity of <b>1-3</b> in acetonitrile.....                                                                                                                                                                                                                                                                                                               | S3 |
| <b>Scheme S1</b> Different resonance states of substituted benzene rings. Q is the quinoidal structure, exhibiting the best ICT. D is the electron donor while A is the electron acceptor.....                                                                                                                                                                                        | S3 |
| <b>Scheme S2</b> Three inputs for geometrical optimization. From left to right: monodentate, bidentate chelating and bidentate bridging. ....                                                                                                                                                                                                                                         | S4 |
| <b>Figure S1</b> Optimized structures of $\text{TiO}_2$ , <b>1TiO<sub>2</sub></b> , <b>2TiO<sub>2</sub></b> and <b>3TiO<sub>2</sub></b> . All the three inputs (monodentate, bidentate chelating and bidentate bridging) give rise to a monodentate structure in the end, implying that the monodentate adsorption mode affords the best stability for these $-\text{NO}_2$ dyes..... | S4 |
| <b>Table S2</b> Electronic transitions of <b>1TiO<sub>2</sub></b> , <b>2TiO<sub>2</sub></b> and <b>3TiO<sub>2</sub></b> obtained from TDDFT calculations. H: HOMO. L: LUMO.....                                                                                                                                                                                                       | S5 |
| <b>Table S3</b> Oxygen to titanium distance (O...Ti distance), diphenyl angle and adsorption energy of <b>1TiO<sub>2</sub></b> , <b>2TiO<sub>2</sub></b> and <b>3TiO<sub>2</sub></b> . ....                                                                                                                                                                                           | S5 |
| <b>Table S4</b> Average values and errors for $\eta$ , $J_{sc}$ , $V_{oc}$ and $FF$ with repeated fabrication and testing.....                                                                                                                                                                                                                                                        | S6 |
| <b>Figure S2</b> Typical $J-V$ curves of these $-\text{NO}_2$ substituted dyes, indicating the capability of the $-\text{NO}_2$ group.....                                                                                                                                                                                                                                            | S7 |
| <b>Figure S3</b> Photos of electrodes after sensitization with the $\text{NO}_2$ dyes compared with pure $\text{TiO}_2$ without sensitization. From left to right: pure $\text{TiO}_2$ , <b>1TiO<sub>2</sub></b> , <b>2TiO<sub>2</sub></b> and <b>3TiO<sub>2</sub></b> .....                                                                                                          | S7 |

**Table S1** Absorption intensity of **1-3** in acetonitrile

|                                                  | <b>1</b> | <b>2</b> | <b>3</b> |
|--------------------------------------------------|----------|----------|----------|
| Molar extinction coefficient ( $M^{-1}cm^{-1}$ ) | 6332     | 16778    | 41381    |

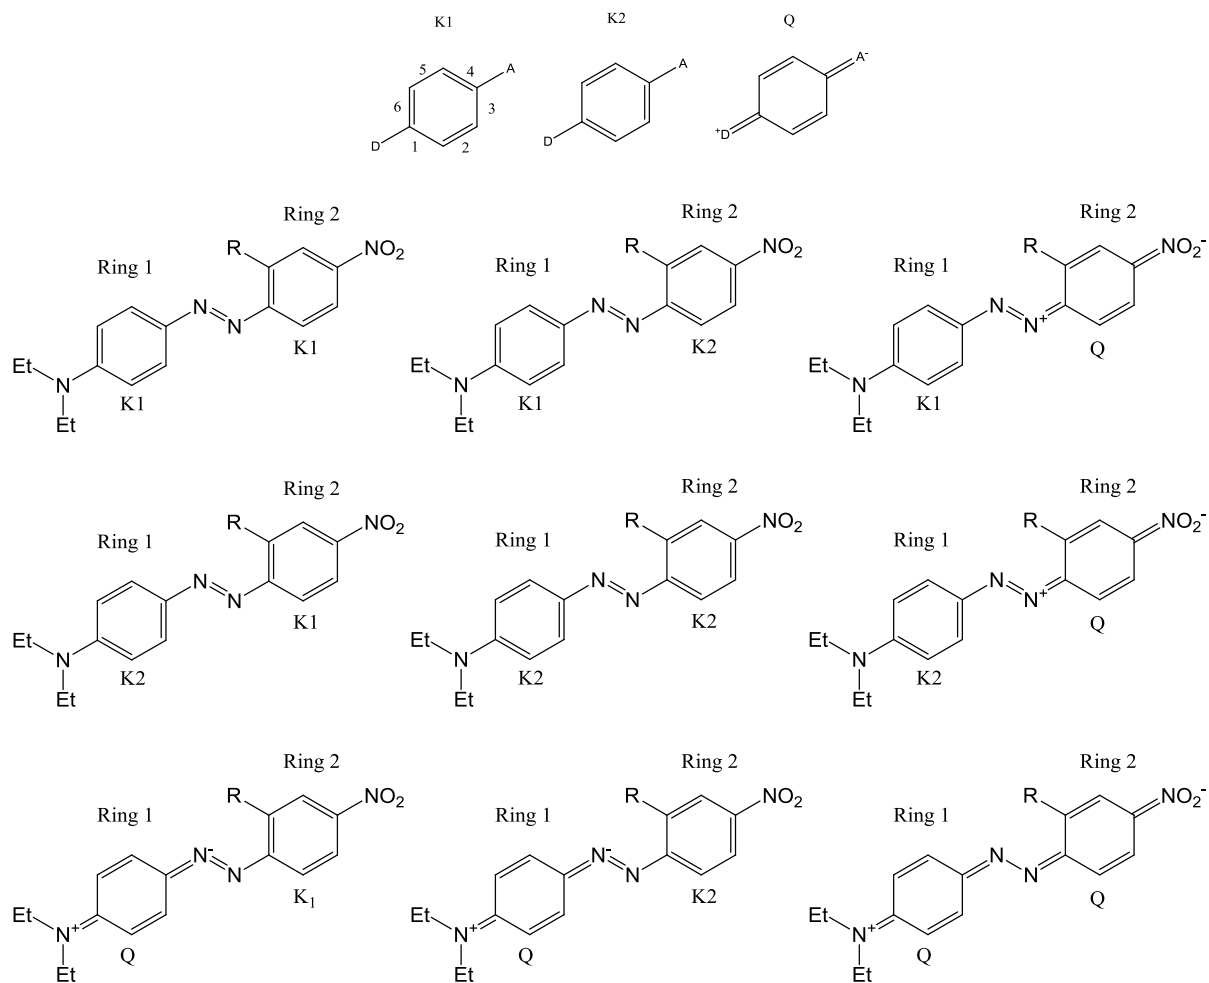

**Scheme S1** Different resonance states of azo dyes with substituted benzene rings. Q is the quinoidal structure. D is the electron donor while A is the electron acceptor.

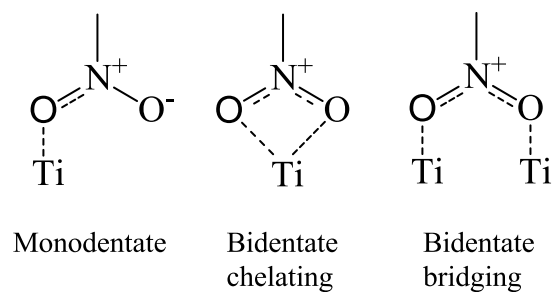

**Scheme S2** Three inputs for geometrical optimization. From left to right: monodentate, bidentate chelating and bidentate bridging.

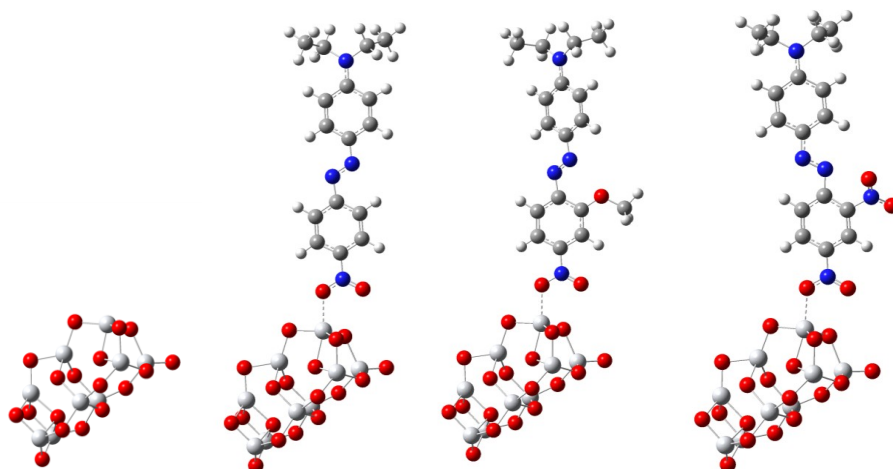

**Figure S1** Optimized structures of  $\text{TiO}_2$ ,  $1\text{TiO}_2$ ,  $2\text{TiO}_2$  and  $3\text{TiO}_2$ . All the three inputs (monodentate, bidentate chelating and bidentate bridging) give rise to a monodentate structure in the end, implying that the monodentate adsorption mode affords the best stability for these  $-\text{NO}_2$  dyes.

**Table S2** Electronic transitions of **1TiO<sub>2</sub>**, **2TiO<sub>2</sub>** and **3TiO<sub>2</sub>** obtained from TDDFT calculations.

H: HOMO. L: LUMO

|                         | Peak wavelength (nm)    | Oscillator strength | Major Contributions            |
|-------------------------|-------------------------|---------------------|--------------------------------|
| <b>1TiO<sub>2</sub></b> | 600                     | 0.0070              | H-1 to L (0.68)                |
|                         | 572                     | 1.0938              | H to L (0.71)                  |
|                         | 432                     | 0.0002              | H to L+1 (0.71)                |
|                         | 408                     | 0.0005              | H to L+2 (0.70)                |
|                         | 398                     | 0.0134              | H-2 to L (0.68)                |
|                         | 397                     | 0.0018              | H to L+3 (0.70)                |
|                         | <b>2TiO<sub>2</sub></b> | 650                 | 0.1657                         |
| 606                     |                         | 0.8194              | H to L (0.66)                  |
| 461                     |                         | 0.0001              | H to L+1 (0.71)                |
| 445                     |                         | 0.0344              | H-2 to L (0.68)                |
| 434                     |                         | 0.0001              | H to L+2 (0.70)                |
| 421                     |                         | 0.0003              | H to L+3 (0.70)                |
| <b>3TiO<sub>2</sub></b> |                         | 621                 | 0.0720                         |
|                         | 580                     | 0.9245              | H-1 to L (0.29), H to L (0.63) |
|                         | 423                     | 0.2188              | H to L+2 (0.61)                |
|                         | 420                     | 0.0041              | H-2 to L (0.67)                |
|                         | 419                     | 0.0008              | H to L+1 (0.70)                |

**Table S3** Oxygen to titanium distance (O...Ti distance), diphenyl angle and adsorption energy of **1TiO<sub>2</sub>**, **2TiO<sub>2</sub>** and **3TiO<sub>2</sub>**.

| Compound                | O...Ti Distance (Å) | Diphenyl angle (°) | Adsorption energy (eV) |
|-------------------------|---------------------|--------------------|------------------------|
| <b>1TiO<sub>2</sub></b> | 2.144               | 2.82               | 1.28                   |
| <b>2TiO<sub>2</sub></b> | 2.140               | 29.83              | 1.29                   |
| <b>3TiO<sub>2</sub></b> | 2.160               | 20.24              | 1.17                   |

**Table S4** Average values and errors for  $\eta$ ,  $J_{sc}$ ,  $V_{oc}$  and  $FF$  with repeated fabrication and testing.

| $\eta$             |      |      |      |         |       |
|--------------------|------|------|------|---------|-------|
| Fabrication number |      |      |      |         |       |
| Dye                | i    | ii   | iii  | Average | Error |
| N3                 | 3.68 | 3.58 | 3.72 | 3.63    | 2%    |
| <b>1</b>           | 0.03 | 0.03 | 0.03 | 0.03    | 2%    |
| <b>2</b>           | 0.03 | 0.03 | 0.03 | 0.03    | 6%    |
| <b>3</b>           | 0.04 | 0.03 | -    | 0.04    | 12%   |

| $J_{sc}$           |       |       |       |         |       |
|--------------------|-------|-------|-------|---------|-------|
| Fabrication number |       |       |       |         |       |
| Dye                | i     | ii    | iii   | Average | Error |
| N3                 | 11.96 | 12.29 | 11.70 | 11.98   | 2%    |
| <b>1</b>           | 0.14  | 0.14  | 0.14  | 0.14    | 2%    |
| <b>2</b>           | 0.16  | 0.15  | 0.14  | 0.15    | 6%    |
| <b>3</b>           | 0.18  | 0.17  | -     | 0.18    | 4%    |

| $V_{oc}$           |      |      |      |         |       |
|--------------------|------|------|------|---------|-------|
| Fabrication number |      |      |      |         |       |
| Dye                | i    | ii   | iii  | Average | Error |
| N3                 | 0.69 | 0.69 | 0.68 | 0.67    | 3%    |
| <b>1</b>           | 0.36 | 0.37 | 0.37 | 0.37    | 2%    |
| <b>2</b>           | 0.38 | 0.38 | 0.37 | 0.38    | 1%    |
| <b>3</b>           | 0.40 | 0.38 | -    | 0.39    | 3%    |

| <b>FF</b>          |      |      |      |         |       |
|--------------------|------|------|------|---------|-------|
| Fabrication number |      |      |      |         |       |
| Dye                | i    | ii   | iii  | Average | Error |
| N3                 | 0.45 | 0.43 | 0.47 | 0.45    | 2%    |
| <b>1</b>           | 0.50 | 0.50 | 0.50 | 0.50    | 1%    |
| <b>2</b>           | 0.51 | 0.51 | 0.52 | 0.51    | 2%    |
| <b>3</b>           | 0.55 | 0.50 | -    | 0.53    | 6%    |

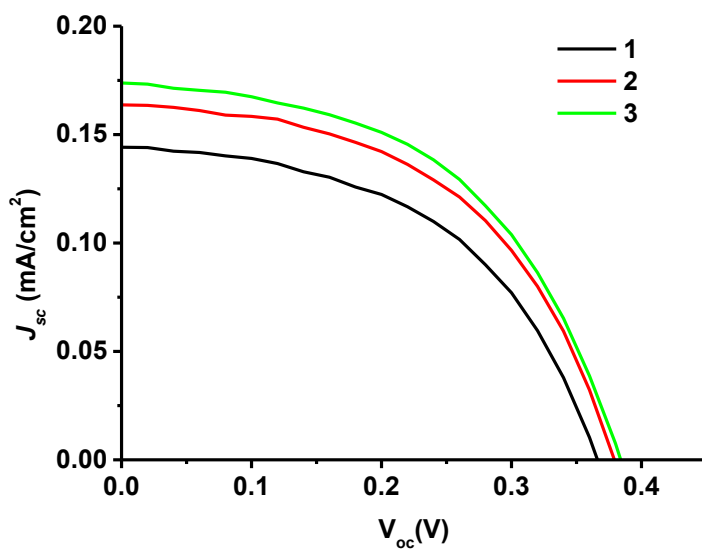

**Figure S2** Typical  $J$ - $V$  curves of these  $-\text{NO}_2$  substituted dyes, indicating the capability of the  $-\text{NO}_2$  group.

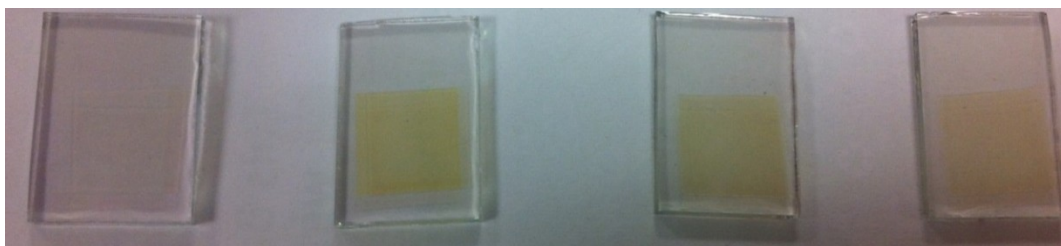

**Figure S3** Photos of electrodes after sensitization with the  $\text{NO}_2$  dyes compared with pure  $\text{TiO}_2$  without sensitization. From left to right: pure  $\text{TiO}_2$ ,  $1\text{TiO}_2$ ,  $2\text{TiO}_2$  and  $3\text{TiO}_2$ .
